# Supplementary material for: Modelling Systemic Iron Regulation during Dietary Iron Overload and Acute Inflammation: Role of Hepcidin-Independent Mechanisms
Source: PLoS Comput Biol. 2017 Jan 9;13(1):e1005322. doi: 10.1371/journal.pcbi.1005322 (PMC5261815; doi:10.1371/journal.pcbi.1005322)
Supplement: S2 Dataset — The file contains measured values for several iron parameters in the first 48 hours after LPS injection in C57BL/6-mice. Results for both mice on a normal diet and on an iron enriched diet (4 weeks before LPS injection) are included. Data for the normal iron diet as well as the state after 4 weeks of iron enriched diet but before LPS injection were used for calibration. Remaining data (LPS response for iron enriched diet) were used for validation. All data are shown in Fig 3. (XLSX) [file pcbi.1005322.s011.xlsx]

## Sheet: 20150115_VLNvalidationMouseList
Age (w)	Animal ID	Cage	Project	Mother 1	Mother 2	Father	Date of Birth	Line (Strain)	Sex	Project	Animal ID	Injection
8	MHE-009030	SKLS-10562	control normal iron diet	KLS-565308	KLS-565309	KLS-565022	14/11/14	C57BL/6J	m	control normal iron diet	MHE-009030	control - 18h
8	MHE-009031	SKLS-10562	control normal iron diet	KLS-565308	KLS-565309	KLS-565022	14/11/14	C57BL/6J	m	control normal iron diet	MHE-009031	control - 18h
8	MHE-009032	SKLS-10562	control normal iron diet	KLS-565308	KLS-565309	KLS-565022	14/11/14	C57BL/6J	m	control normal iron diet	MHE-009032	control - 18h
8	MHE-009033	SKLS-10562	control normal iron diet	KLS-565308	KLS-565309	KLS-565022	14/11/14	C57BL/6J	m	control normal iron diet	MHE-009033	control - 18h
8	MHE-009020	SKLS-10564	High iron diet	KLS-020083	KLS-566334	KLS-561893	14/11/14	C57BL/6J	m	High iron diet	MHE-009020	control - 18h
8	MHE-009021	SKLS-10564	High iron diet	KLS-020083	KLS-566334	KLS-561893	14/11/14	C57BL/6J	m	High iron diet	MHE-009021	control - 18h
8	MHE-009022	SKLS-10564	High iron diet	KLS-020083	KLS-566334	KLS-561893	14/11/14	C57BL/6J	m	High iron diet	MHE-009022	control - 18h
8	MHE-009023	SKLS-10564	High iron diet	KLS-566244	KLS-566245	KLS-020743	14/11/14	C57BL/6J	m	High iron diet	MHE-009023	control - 18h
9	MHE-009040	SKLS-10541	control normal iron diet	KLS-564815	KLS-564816	KLS-564651	2014-12-11	C57BL/6J	m	control normal iron diet	MHE-009040	control - 48h
9	MHE-009041	SKLS-10541	control normal iron diet	KLS-564815	KLS-564816	KLS-564651	2014-12-11	C57BL/6J	m	control normal iron diet	MHE-009041	control - 48h
9	MHE-009042	SKLS-10541	control normal iron diet	KLS-018276	KLS-018277	KLS-018051	2014-12-11	C57BL/6J	m	control normal iron diet	MHE-009042	control - 48h
9	MHE-009043	SKLS-10541	control normal iron diet	KLS-018276	KLS-018277	KLS-018051	2014-12-11	C57BL/6J	m	control normal iron diet	MHE-009043	control - 48h
9	MHE-009077	SKLS-10554	High iron diet	KLS-566340	KLS-566341	KLS-566375	2014-12-11	C57BL/6J	m	High iron diet	MHE-009077	control - 48h
9	MHE-009078	SKLS-10554	High iron diet	KLS-566340	KLS-566341	KLS-566375	2014-12-11	C57BL/6J	m	High iron diet	MHE-009078	control - 48h
9	MHE-009019	SKLS-10564	High iron diet	KLS-565023	KLS-565024	KLS-565017	13/11/14	C57BL/6J	m	High iron diet	MHE-009019	control - 48h
8	MHE-009034	SKLS-10572	High iron diet	KLS-566244	KLS-566245	KLS-020743	14/11/14	C57BL/6J	m	High iron diet	MHE-009034	control - 48h
9	MHE-008994	SKLS-10528	control normal iron diet	KLS-564326	KLS-564757	KLS-564604	2014-11-11	C57BL/6J	m	control normal iron diet	MHE-008994	control - 6h
9	MHE-008995	SKLS-10528	control normal iron diet	KLS-566379	KLS-566380	KLS-566378	2014-12-11	C57BL/6J	m	control normal iron diet	MHE-008995	control - 6h
9	MHE-008996	SKLS-10528	control normal iron diet	KLS-566379	KLS-566380	KLS-566378	2014-12-11	C57BL/6J	m	control normal iron diet	MHE-008996	control - 6h
9	MHE-008997	SKLS-10528	control normal iron diet	KLS-566379	KLS-566380	KLS-566378	2014-12-11	C57BL/6J	m	control normal iron diet	MHE-008997	control - 6h
9	MHE-009044	SKLS-10543	High iron diet	KLS-018276	KLS-018277	KLS-018051	2014-12-11	C57BL/6J	m	High iron diet	MHE-009044	control - 6h
9	MHE-009045	SKLS-10543	High iron diet	KLS-018276	KLS-018277	KLS-018051	2014-12-11	C57BL/6J	m	High iron diet	MHE-009045	control - 6h
9	MHE-009046	SKLS-10543	High iron diet	KLS-018280	KLS-018281	KLS-017997	2014-12-11	C57BL/6J	m	High iron diet	MHE-009046	control - 6h
9	MHE-009047	SKLS-10543	High iron diet	KLS-018280	KLS-018281	KLS-017997	2014-12-11	C57BL/6J	m	High iron diet	MHE-009047	control - 6h
8	MHE-009036	SKLS-10572	High iron diet	KLS-564329	KLS-564330	KLS-564608	16/11/14	C57BL/6J	m	High iron diet	MHE-009036	kill
8	MHE-009037	SKLS-10572	High iron diet	KLS-564329	KLS-564330	KLS-564608	16/11/14	C57BL/6J	m	High iron diet	MHE-009037	kill
8	MHE-009038	SKLS-10572	High iron diet	KLS-564329	KLS-564330	KLS-564608	16/11/14	C57BL/6J	m	High iron diet	MHE-009038	kill
9	MHE-009003	SKLS-10534	control normal iron diet	KLS-562644	KLS-562645	KLS-562994	2014-12-11	C57BL/6J	m	control normal iron diet	MHE-009003	LPS - 18h
9	MHE-009004	SKLS-10534	control normal iron diet	KLS-562644	KLS-562645	KLS-562994	2014-12-11	C57BL/6J	m	control normal iron diet	MHE-009004	LPS - 18h
9	MHE-009005	SKLS-10534	control normal iron diet	KLS-562644	KLS-562645	KLS-562994	2014-12-11	C57BL/6J	m	control normal iron diet	MHE-009005	LPS - 18h
9	MHE-009006	SKLS-10534	control normal iron diet	KLS-562644	KLS-562645	KLS-562994	2014-12-11	C57BL/6J	m	control normal iron diet	MHE-009006	LPS - 18h
9	MHE-009007	SKLS-10534	control normal iron diet	KLS-566340	KLS-566341	KLS-566375	2014-12-11	C57BL/6J	m	control normal iron diet	MHE-009007	LPS - 18h
9	MHE-009039	SKLS-10541	control normal iron diet	KLS-564815	KLS-564816	KLS-564651	2014-12-11	C57BL/6J	m	control normal iron diet	MHE-009039	LPS - 18h
9	MHE-009048	SKLS-10543	High iron diet	KLS-018280	KLS-018281	KLS-017997	2014-12-11	C57BL/6J	m	High iron diet	MHE-009048	LPS - 18h
9	MHE-008998	SKLS-10581	High iron diet	KLS-566340	KLS-566341	KLS-566375	2014-12-11	C57BL/6J	m	High iron diet	MHE-008998	LPS - 18h
9	MHE-008999	SKLS-10581	High iron diet	YPS-003578		YPS-003573	2014-12-11	C57BL/6J	m	High iron diet	MHE-008999	LPS - 18h
9	MHE-009000	SKLS-10581	High iron diet	YPS-003578		YPS-003573	2014-12-11	C57BL/6J	m	High iron diet	MHE-009000	LPS - 18h
9	MHE-009001	SKLS-10581	High iron diet	YPS-003578		YPS-003573	2014-12-11	C57BL/6J	m	High iron diet	MHE-009001	LPS - 18h
9	MHE-009002	SKLS-10581	High iron diet	YPS-003578		YPS-003573	2014-12-11	C57BL/6J	m	High iron diet	MHE-009002	LPS - 18h
9	MHE-009024	SKLS-10559	control normal iron diet	KLS-564005	KLS-564006	YPS-556977	13/11/14	C57BL/6J	m	control normal iron diet	MHE-009024	LPS - 6h
9	MHE-009025	SKLS-10559	control normal iron diet	KLS-564005	KLS-564006	YPS-556977	13/11/14	C57BL/6J	m	control normal iron diet	MHE-009025	LPS - 6h
9	MHE-009026	SKLS-10559	control normal iron diet	KLS-564005	KLS-564006	YPS-556977	13/11/14	C57BL/6J	m	control normal iron diet	MHE-009026	LPS - 6h
8	MHE-009027	SKLS-10559	control normal iron diet	KLS-565308	KLS-565309	KLS-565022	14/11/14	C57BL/6J	m	control normal iron diet	MHE-009027	LPS - 6h
8	MHE-009028	SKLS-10559	control normal iron diet	KLS-565308	KLS-565309	KLS-565022	14/11/14	C57BL/6J	m	control normal iron diet	MHE-009028	LPS - 6h
8	MHE-009029	SKLS-10562	control normal iron diet	KLS-565308	KLS-565309	KLS-565022	14/11/14	C57BL/6J	m	control normal iron diet	MHE-009029	LPS - 6h
8	MHE-009035	SKLS-10572	High iron diet	KLS-566244	KLS-566245	KLS-020743	14/11/14	C57BL/6J	m	High iron diet	MHE-009035	LPS - 6h
8	MHE-009008	SKLS-10576	High iron diet	KLS-018617	KLS-018618	KLS-018877	15/11/14	C57BL/6J	m	High iron diet	MHE-009008	LPS - 6h
8	MHE-009009	SKLS-10576	High iron diet	KLS-018617	KLS-018618	KLS-018877	15/11/14	C57BL/6J	m	High iron diet	MHE-009009	LPS - 6h
8	MHE-009010	SKLS-10576	High iron diet	KLS-018617	KLS-018618	KLS-018877	15/11/14	C57BL/6J	m	High iron diet	MHE-009010	LPS - 6h
8	MHE-009011	SKLS-10576	High iron diet	KLS-018617	KLS-018618	KLS-018877	15/11/14	C57BL/6J	m	High iron diet	MHE-009011	LPS - 6h
8	MHE-009012	SKLS-10576	High iron diet	KLS-018617	KLS-018618	KLS-018877	15/11/14	C57BL/6J	m	High iron diet	MHE-009012	LPS - 6h
9	MHE-009055	SKLS-10538	control normal iron diet	KLS-565342	KLS-565343	KLS-565339	2014-12-11	C57BL/6J	m	control normal iron diet	MHE-009055	LPS - 48h
9	MHE-009056	SKLS-10538	control normal iron diet	KLS-565342	KLS-565343	KLS-565339	2014-12-11	C57BL/6J	m	control normal iron diet	MHE-009056	LPS - 48h
9	MHE-009057	SKLS-10538	control normal iron diet	KLS-565342	KLS-565343	KLS-565339	2014-12-11	C57BL/6J	m	control normal iron diet	MHE-009057	LPS - 48h
9	MHE-009058	SKLS-10538	control normal iron diet	KLS-565342	KLS-565343	KLS-565339	2014-12-11	C57BL/6J	m	control normal iron diet	MHE-009058	LPS - 48h
9	MHE-009059	SKLS-10538	control normal iron diet	KLS-565342	KLS-565343	KLS-565339	2014-12-11	C57BL/6J	m	control normal iron diet	MHE-009059	LPS - 48h
9	MHE-009060	SKLS-10538	control normal iron diet	KLS-565342	KLS-565343	KLS-565339	2014-12-11	C57BL/6J	m	control normal iron diet	MHE-009060	LPS - 48h
9	MHE-009049	SKLS-10553	High iron diet	KLS-564327	KLS-564328	KLS-564609	2014-12-11	C57BL/6J	m	High iron diet	MHE-009049	LPS - 48h
9	MHE-009050	SKLS-10553	High iron diet	KLS-564327	KLS-564328	KLS-564609	2014-12-11	C57BL/6J	m	High iron diet	MHE-009050	LPS - 48h
9	MHE-009051	SKLS-10553	High iron diet	KLS-564327	KLS-564328	KLS-564609	2014-12-11	C57BL/6J	m	High iron diet	MHE-009051	LPS - 48h
9	MHE-009052	SKLS-10553	High iron diet	KLS-564327	KLS-564328	KLS-564609	2014-12-11	C57BL/6J	m	High iron diet	MHE-009052	LPS - 48h
9	MHE-009053	SKLS-10553	High iron diet	KLS-566338	KLS-566339	KLS-020756	2014-12-11	C57BL/6J	m	High iron diet	MHE-009053	LPS - 48h
9	MHE-009054	SKLS-10553	High iron diet	KLS-566338	KLS-566339	KLS-020756	2014-12-11	C57BL/6J	m	High iron diet	MHE-009054	LPS - 48h
9	MHE-008988	SKLS-10526	control normal iron diet	KLS-565344	KLS-565345	KLS-565340	2014-09-11	C57BL/6J	m	control normal iron diet	MHE-008988	no treatment
9	MHE-008989	SKLS-10526	control normal iron diet	KLS-565344	KLS-565345	KLS-565340	2014-09-11	C57BL/6J	m	control normal iron diet	MHE-008989	no treatment
9	MHE-008990	SKLS-10526	control normal iron diet	KLS-565344	KLS-565345	KLS-565340	2014-09-11	C57BL/6J	m	control normal iron diet	MHE-008990	no treatment
9	MHE-008991	SKLS-10526	control normal iron diet	KLS-564326	KLS-564757	KLS-564604	2014-11-11	C57BL/6J	m	control normal iron diet	MHE-008991	no treatment
9	MHE-008992	SKLS-10526	control normal iron diet	KLS-564326	KLS-564757	KLS-564604	2014-11-11	C57BL/6J	m	control normal iron diet	MHE-008992	no treatment
9	MHE-008993	SKLS-10528	control normal iron diet	KLS-564326	KLS-564757	KLS-564604	2014-11-11	C57BL/6J	m	control normal iron diet	MHE-008993	no treatment
9	MHE-009013	SKLS-10579	High iron diet	KLS-564640		KLS-564635	2014-11-11	C57BL/6J	m	High iron diet	MHE-009013	no treatment
9	MHE-009014	SKLS-10579	High iron diet	KLS-564640		KLS-564635	2014-11-11	C57BL/6J	m	High iron diet	MHE-009014	no treatment
9	MHE-009015	SKLS-10579	High iron diet	KLS-564640		KLS-564635	2014-11-11	C57BL/6J	m	High iron diet	MHE-009015	no treatment
9	MHE-009016	SKLS-10579	High iron diet	KLS-564640		KLS-564635	2014-11-11	C57BL/6J	m	High iron diet	MHE-009016	no treatment
9	MHE-009017	SKLS-10579	High iron diet	KLS-564640		KLS-564635	2014-11-11	C57BL/6J	m	High iron diet	MHE-009017	no treatment
9	MHE-009018	SKLS-10579	High iron diet	KLS-564640		KLS-564635	2014-11-11	C57BL/6J	m	High iron diet	MHE-009018	no treatment

## Sheet: Experimental details
LPS:
SIGMA L3012-5MG (LOT 123M4094V solved in NaCl (injection quality) - 1 ug/uL final concentration
Injections: 100 uL NaCL = control / 100 uL NaCl with 22 ug LPS
Mouse weight: ca 22 g
Dosis: 1 ug LPS / g mouse weight
Injections by Klaus Schmitt, EMBL
Mice were killed with Isofluran, blood was taken by cardiac puncture (heparin), mice were opened, spleen taken out (weighted, splitted into 3-4 pieces - pole-> iron measurements, central pieces-> RNA and protein), liver was taken out (weighted, cutted), lung, heart (divided), kidneys (divided), duodenum (opened and washed -> only iron measurement), remaining intestine disposed and remaining carca…
Food:	from	until	Food	Producer
dob	11.11.2014	16.11.2014
weaning	?	special diet (21.12.2014) 5-6w	EMBL std. Teklad 2018S, 200 ppm iron	Harlan,
Fe-diet	21.12.2014	organ sampling (4w)# 19.1.-22.1.2015	EF E15510-24 +200 mg Iron/kg	SNIFF
Control-diet	21.12.2014		EF E15510-24 +2% Cabonyl Iron	SNIFF
age at end of experiment		9.5-10w

## Sheet: DATA-Table
TREATMENTS AND MOUSE INFO													WEIGHTS										Haematology													BLOOD/PlasmaIronParameters							qPCR data - mRNA expression LIVER
food	short name	treatment	incubation time group (h)	injection date	date of sampleing		group (short)		Animal ID	notes	lab ID	kill time	weight (g)	liver wet (g)	spleen wet weight (g)	theoretical dry weight of kidney (g)	kidney dry weight (one kidney) (g)	heart dry weight (1 heart (g)	duodenum dry weight (g)	total lung weight (dry weight in g)	total carcass weight (dry weight in g)	ratio mouse weight (g) / carcass dry weight (g)	HCT	RBC (10^6 / uL)	Hgb (g/dL)	WBC (10^3/mL)	MCH	MCHC	MCV (fL)	MPV	PLT	RDW	MON	LYM	GRA	calc. total blood volume (mL)	calc. total Hgb-Fe (mg/25g mouse)	plasma iron (ug/dL)	UIBC (ug/dL)	TIBC (ug/dL)	Tf-sat (%)	calc. total plasma iron (ug/25g mouse)	Gapdh		IL6	Hep1	Socs3	Saa2	Smad7
control normal iron diet	no treatment		0	-	19.1.2015 9:00		no treatment		MHE-008993		1	09:08:00	18.5	1.141	0.05	0.037	0.0300333	0.0224	0.011	0.0217333	4.9465	3.74002														1.45225		150.441	206.271	356.712	42.1743	2.9524	0.640051		0.179233	0.115092	0.119617	0.00911165	0.440022
High iron diet	no treatment		0	-	19.1.2015 9:00		no treatment		MHE-009016		2	09:21:00	22.9	1.288	0.079	0.0458	0.0372	0.0244	0.0142	0.0276	7.12813	3.21262														1.79765		229.966	57.0457	287.012	80.1243	4.51309	0.915356		0.125222	1.05699	0.0828135	0.0141986	2.94018
control normal iron diet	no treatment		0	-	19.1.2015 9:00		no treatment		MHE-008991		3	09:33:00	19.1	1.198	0.0523	0.0382	0.0343667	0.0218	NA	0.03035	5.80697	3.28915														1.49935		181.846	158.67	340.516	53.403	3.56872	0.867444		0.221758	0.320991	0.216129	0.0234401	0.843424
High iron diet	no treatment		0	-	19.1.2015 9:00		no treatment		MHE-009013		4	09:43:00	23.6	1.348	0.0754	0.0472	0.0350667	0.0306	0.013	0.0269	6.84763	3.44645														1.8526		279.1	19.2671	298.367	93.5425	5.47734	0.821857		0.351586	1.25967	0.109939	0.0195241	2.50062
control normal iron diet	no treatment		0	-	19.1.2015 9:00		no treatment		MHE-008990		5	09:53:00	21	1.284	0.0551	0.042	0.0324333	0.0204	0.0105	0.0269	5.61967	3.73688														1.6485		156.772	141.292	298.064	52.5968	3.07665	0.702862		0.271856	0.24041	0.116175	0.0114257	0.759221
High iron diet	no treatment		0	-	19.1.2015 9:00		no treatment		MHE-009014		6	10:01:00	19.4	1.01	0.0558	0.0388	0.0289333	0.0189	0.0119667	0.0253	5.43467	3.56968														1.5229		224.141	32.1118	256.253	87.4687	4.39877	0.983711		0.558552	1.18162	0.0829893	0.0217847	2.06433
control normal iron diet	no treatment		0	-	19.1.2015 9:00		no treatment		MHE-008989		7	10:09:00	22.3	1.55	0.06	0.0446	0.0409667	0.0229	0.0132	0.0281	6.2595	3.56258														1.75055		132.712	180.96	313.671	42.3092	2.60447	0.823881		0.523717	0.239591	0.126055	0.0101523	0.638806
High iron diet	no treatment		0	-	19.1.2015 9:00		no treatment		MHE-009018		8	10:18:00	22.4	1.48	0.08	0.0448	0.0381667	0.0222	0.0158333	0.0274	6.8392	3.27524														1.7584		229.207	34.3785	263.585	86.9573	4.49818	0.833817		0.61218	1.26461	0.212931	0.0196864	2.42688
control normal iron diet	no treatment		0	-	19.1.2015 9:00		no treatment		MHE-008992		9	10:27:00	18.5	1.174	0.053	0.037	0.0311667	0.0188	0.0136667	0.02205	5.702	3.24448														1.45225		144.615	140.159	284.774	50.7825	2.83808	0.839646		0.333651	0.22601	0.140517	0.0197449	0.588182
High iron diet	no treatment		0	-	19.1.2015 9:00		no treatment		MHE-009015		10	10:35:00	23.3	1.303	0.072	0.0466	0.0393667	0.0238	0.0173667	0.03015	7.45837	3.12401														1.82905		225.154	34.7563	259.911	86.6276	4.41865	0.91772		0.0417352	1.69843	0.101083	0.0242024	2.89418
control normal iron diet	no treatment		0	-	19.1.2015 9:00		no treatment		MHE-008988		11	10:44:00	21.2	1.308	0.0588	0.0424	0.0317	0.0223	0.00943333	0.02575	6.23857	3.39822														1.6642		134.991	157.537	292.528	46.1464	2.6492	0.961943		0.212321	0.338021	0.201164	0.0259103	1.00672
High iron diet	no treatment		0	-	19.1.2015 9:00		no treatment		MHE-009017		12	10:52:00	21.8	1.297	0.075	0.0436	0.0287	0.023	0.0099	0.02915	6.4858	3.36119														1.7113		246.175	30.2229	276.398	89.0655	4.83119	1.0543		0.173215	1.41674	0.199496	0.0177873	2.79133
control normal iron diet	control - 6h	control	6	19.1.2015 9:00	19.1.2015 15:00		6h - NaCl control		MHE-008996		13	15:00:00	21.5	1.256	0.063	0.043	0.0330667	0.023	0.0128333	0.02975	6.1525	3.49451	56.14	10.55	15.89	7.64	15.07	28.31	53	4.66	1365	12.35	0.2	6.1	1.3	1.68775	1.24546	88.3901	177.56	265.95	33.2357	0.76082	0.829232		0.0446033	0.193505	0.23247	0.0125015	0.479155
High iron diet	control - 6h	control	6	19.1.2015 9:00	19.1.2015 15:00		6h - NaCl +Fe		MHE-009046		14	15:08:00	22	1.082	0.064	0.044	0.0336	0.0229	0.0128333	0.0287	7.4932	2.936	58.46	10.84	16.34	5.67	15.07	27.95	54	4.74	1290	12.67	0.2	4.2	1.3	1.727	1.05872	207.172	14.7337	221.906	93.3604	1.68892	1.06027		0.789486	1.83961	0.980203	0.0685983	4.95678
control normal iron diet	control - 6h	control	6	19.1.2015 9:00	19.1.2015 15:00		6h - NaCl control		MHE-008994		15	15:18:00	20	1.033	0.049	0.04	0.0305667	0.0228	0.01338	0.0264	6.2628	3.19346	55.19	10.58	15.22	3.82	14.39	27.59	52	4.68	1453	11.78	0.2	2.7	0.9	1.57	1.07486	125.367	142.425	267.792	46.815	1.10247	0.970809		0.256673	0.724885	0.303978	0.0119325	1.07954
control normal iron diet	control - 6h	control	6	19.1.2015 9:00	19.1.2015 15:00		6h - NaCl control		MHE-008995		16	15:28:00	19.7	1.192	0.046	0.0394	0.0312333	0.0213	0.0142	0.02695	5.4709	3.60087	52.02	9.9	14.27	5.42	14.41	27.43	53	4.58	1156	11.83	0.2	4.1	1.1	1.54645	0.803376	114.73	133.736	248.466	46.1753	1.08031	0.706667		0.102248	0.495551	0.174955	0.019	0.620908
High iron diet	control - 6h	control	6	19.1.2015 9:00	19.1.2015 15:00		6h - NaCl +Fe		MHE-009045		17	15:36:00	25	1.382	0.082	0.05	0.0414333	0.0256	0.0155667	0.0289	7.1838	3.48005	53.58	9.77	14.88	7.76	15.23	27.77	55	4.7	1353	12.9	0.5	5.1	2.2	1.9625	1.19471	200.587	40.8009	241.388	83.0974	1.82734	0.873293		0.397096	1.74221	0.200774	0.124433	1.99116
High iron diet	control - 6h	control	6	19.1.2015 9:00	19.1.2015 15:00		6h - NaCl +Fe		MHE-009047		18	15:45:00	22.6	1.244	0.076	0.0452	0.0337333	0.0246	0.0173333	0.0237	6.1712	3.66217	50.4	9.21	13.97	5.69	15.16	27.71	55	4.73	1270	13.09	0.3	4	1.4	1.7741	1.0976	187.924	9.44465	197.369	95.2147	1.82925	1.10971		0.12838	1.85448	0.181108	0.0770164	2.34135
control normal iron diet	control - 6h	control	6	19.1.2015 9:00	19.1.2015 15:00		6h - NaCl control		MHE-008997		19	15:55:00	20.9	1.293	0.054	0.0418	0.0340667	0.0229	0.0215333	0.0238	6.3163	3.3089	55.26	10.58	15.24	4.86	14.41	27.58	52	4.54	1311	12.12	0.2	3.8	0.9	1.64065	0.963312	116.503	139.781	256.284	45.4585	1.02292	0.86778		0.0877691	0.433813	0.152096	0.0224462	0.405627
High iron diet	control - 6h	control	6	19.1.2015 9:00	19.1.2015 15:00		6h - NaCl +Fe		MHE-009044		20	16:03:00	21.13	1.107	0.061	0.04226	0.0358	0.023	0.0134667	0.02535	6.6946	3.15628	54.45	10.14	15.14	3.13	14.94	27.81	54	4.62	1338	12.79	0.1	2.3	0.7	1.65871	0.963203	189.444	50.6233	240.067	78.9128	1.69347	1.15097		0.110115	1.67415	0.13444	0.0137702	1.47799
control normal iron diet	control - 18h	control	18	19.1.2015 13:00	20.1.2015 7:00		18h - NaCl control		MHE-009030		21	07:08:00	22.7	1.643	0.056	0.0454	0.0351333	0.0238	0.0203	0.0251			55.28	10.48	15.59	6.2	14.88	28.19	53	4.77	1353	12.26	0.1	5.1	1	1.78195	1.29015	169.689	125.047	294.736	57.5731	1.48924	1.14748		0.185882	0.383547	0.286891	0.0211002	1.02559
High iron diet	control - 18h	control	18	19.1.2015 13:00	20.1.2015 7:00		18h - NaCl +Fe		MHE-009021		22	07:16:00	19.26	0.796	0.085	0.03852	0.0357333	0.0231	0.0150333	0.0258			58.04	9.93	16.38	7.52	16.49	28.22	58	5.11	336	13.08	0.5	4.7	2.3	1.51191	0.913177	222.622	0.377786	222.999	99.8306	1.83321	1.18185		0.996204	1.63321	0.659135	0.122753	3.53239
control normal iron diet	control - 18h	control	18	19.1.2015 13:00	20.1.2015 7:00		18h - NaCl control		MHE-009032		23	07:24:00	23.9	1.618	0.073	0.0478	0.0337667	0.0256	0.0110333	0.0339			52.12	9.86	14.58	4.31	14.79	27.97	53	4.73	1236	12.68	0.1	3.5	0.7	1.87615	1.10856	137.271	172.648	309.919	44.2924	1.28986	0.996		0.390779	0.415073	0.177797	0.0213551	0.942524
High iron diet	control - 18h	control	18	19.1.2015 13:00	20.1.2015 7:00		18h - NaCl +Fe		MHE-009022		24	07:32:00	25.2	1.618	0.079	0.0504	0.0344	0.0254	0.0105333	0.0273			51.67	9.41	14.65	3.46	15.56	28.35	55	4.79	1249	13.14	0.1	2.6	0.8	1.9782	1.14215	215.783	35.8897	251.673	85.7396	2.04665	1.04036		0.377452	1.49481	0.105411	0.0403049	3.15884
control normal iron diet	control - 18h	control	18	19.1.2015 13:00	20.1.2015 7:00		18h - NaCl control		MHE-009031		25	07:40:00	22.3	1.405	0.063	0.0446	0.0335333	0.022	0.0156333	0.0269			53.76	10.34	14.91	4.14	14.43	27.74	52	4.66	1305	12.49	0.2	3.1	0.8	1.75055	1.043	144.362	147.714	292.077	49.4261	1.31003	0.850561		0.203436	0.302163	0.148242	0.0217052	0.768109
High iron diet	control - 18h	control	18	19.1.2015 13:00	20.1.2015 7:00		18h - NaCl +Fe		MHE-009020		26	07:48:00	25.7	1.44	0.086	0.0514	0.0371	0.0261	0.0135	0.0343			54.86	10.05	15.52	5.15	15.44	28.29	55	4.72	1307	13.29	0.1	4.2	0.9	2.01745	1.22276	215.783	17.756	233.539	92.397	1.91157	1.21643		0.480397	2.12317	0.0932081	0.10114	3.34013
control normal iron diet	control - 18h	control	18	19.1.2015 13:00	20.1.2015 7:00		18h - NaCl control		MHE-009033		27	07:58:00	22.7	1.416	0.066	0.0454	0.0352	0.0222	0.0163667	0.0270333			51.94	9.85	14.61	3.45	14.84	28.14	53	4.65	1182	12.58	0.1	2.6	0.8	1.78195	1.11837	122.328	142.425	264.753	46.2045	1.15377	0.868865		0.371631	0.239178	0.131247	0.0157936	0.765091
High iron diet	control - 18h	control	18	19.1.2015 13:00	20.1.2015 7:00		18h - NaCl +Fe		MHE-009023		28	08:06:00	22.6	1.22	0.077	0.0452	0.0350667	0.0238	0.0100333	0.0274			53.99	9.99	15.21	2.2	15.23	28.18	54	4.69	1127	13.07	0.1	1.7	0.4	1.7741	1.17683	210.718	23.8005	234.519	89.8513	1.90267	0.942334		0.511064	1.74641	0.154057	0.0831961	2.07831
control normal iron diet	LPS - 18h	22 ug LPS	18	20.1.2015 13:00	21.1.2015 7:00		18h - LPS control		MHE-009039->41		29	07:20:00	21.8	1.404	0.081	0.0436	0.0332	0.026	0.0163	0.0255			51.48	9.89	14.9	5.04	15.07	28.95	52	4.88	496	12.59	0.3	1.6	3.1	1.7113	0.876281	37.2302	284.851	322.081	11.5593	0.354508	1.23263		1.32171	0.485586	4.44936	27.5255	0.481303
High iron diet	LPS - 18h	22 ug LPS	18	20.1.2015 13:00	21.1.2015 7:00		18h - LPS +Fe		MHE-009048		30	07:28:00	22.6	1.27	0.094	0.0452	0.0341667	0.0241	0.0131	0.0294			55.49	10.21	16.4	5.38	16.07	29.56	54	5.29	371	12.32	0.4	2.2	2.8	1.7741	1.10607	173.235	112.958	286.193	60.5308	1.51322	1.04131		5.04742	1.72863	13.9454	31.4729	0.56128
control normal iron diet	LPS - 18h	22 ug LPS	18	20.1.2015 13:00	21.1.2015 7:00		18h - LPS control		MHE-009004		31	07:37:00	22.5	1.322	0.07	0.045	0.0370667	0.0271	0.0108333	0.0243			51.31	9.94	14.68	5.29	14.76	28.6	52	4.77	545	12.39	0.3	1.6	3.4	1.76625	1.06587	49.1338	193.804	242.938	20.2248	0.469494	1.00273		2.09821	0.293701	3.65334	39.9658	0.57025
High iron diet	LPS - 18h	22 ug LPS	18	20.1.2015 13:00	21.1.2015 7:00		18h - LPS +Fe		MHE-008998		32	07:44:00	22.75	1.199	0.102	0.0455	0.0315333	0.0242	0.0161667	0.0282			52.46	9.6	15.39	6.23	16.03	29.33	55	4.98	488	12.83	0.5	1.8	3.9	1.78588	1.11753	148.921	210.805	359.726	41.3985	1.38939	1.05079		3.19023	1.82911	6.41143	47.3839	1.37451
control normal iron diet	LPS - 18h	22 ug LPS	18	20.1.2015 13:00	21.1.2015 7:00		18h - LPS control		MHE-009007		33	07:52:00	20.88	1.311	0.088	0.04176	0.0325	0.0218	0.0135667	0.0246			50.92	9.98	14.65	6.45	14.68	28.77	51	4.76	518	12.22	0.5	1.9	4	1.63908	0.90883	51.1599	282.962	334.122	15.3118	0.49277	1.33362		1.83195	0.301603	3.66044	35.8117	0.623818
High iron diet	LPS - 18h	22 ug LPS	18	20.1.2015 13:00	21.1.2015 7:00		18h - LPS +Fe		MHE-009002	eine Niere mit "Urinblase"	34	08:00:00	23.8	1.246	0.104	0.0476	0.0394333	0.0273	0.0136667	0.02905			55.74	10.37	16.12	5.59	15.54	28.92	54	5.18	382	12.82	0.5	2.3	2.8	1.8683	1.34346	225.914	98.6022	324.516	69.6156	1.9623	1.35586		3.19381	2.53387	13.3854	36.7281	1.18327
control normal iron diet	LPS - 18h	22 ug LPS	18	20.1.2015 13:00	21.1.2015 7:00		18h - LPS control		MHE-009006		35	08:08:00	19	1.073	0.064	0.038	0.0319	0.0212	0.0183333	0.0278			50.87	10	14.92	5.35	14.92	29.33	51	4.68	699	11.94	0.4	1.5	3.4	1.4915	0.799954	34.191	290.895	325.086	10.5175	0.329662	1.57103		1.98866	0.265643	3.59383	26.3261	0.618062
High iron diet	LPS - 18h	22 ug LPS	18	20.1.2015 13:00	21.1.2015 7:00		18h - LPS +Fe		MHE-009001		36	08:16:00	22.5	1.1	0.102	0.045	0.0351667	0.0263	0.0124	0.0333			52.9	9.85	15.25	5.1	15.49	28.84	54	4.86	411	12.53	0.4	1.8	2.9	1.76625	0.918317	128.153	224.027	352.18	36.3885	1.18457	1.19958		2.98904	1.96031	7.03755	33.5397	0.931309
control normal iron diet	LPS - 18h	22 ug LPS	18	20.1.2015 13:00	21.1.2015 7:00		18h - LPS control		MHE-009003		37	08:24:00	22	1.33	0.09	0.044	0.0323333	0.0241	0.0107667	0.0273			52.75	10.22	15.29	5.32	14.96	28.98	52	4.77	509	12.72	0.4	1.7	3.2	1.727	1.01734	62.5569	254.25	316.807	19.7461	0.580079	1.34604		1.51756	0.270508	2.62753	28.1365	0.561543
High iron diet	LPS - 18h	22 ug LPS	18	20.1.2015 13:00	21.1.2015 7:00		18h - LPS +Fe		MHE-008999		38	08:32:00	23.4	1.105	0.102	0.0468	0.0349667	0.0277	0.0125667	0.0307			53.79	10.04	15.47	5.16	15.41	28.75	54	4.84	486	12.19	0.4	1.7	3.1	1.8369	0.949978	85.3509	209.671	295.022	28.9303	0.774023	1.50368		3.53173	2.0067	8.94425	32.0734	0.87682
control normal iron diet	LPS - 18h	22 ug LPS	18	20.1.2015 13:00	21.1.2015 7:00		18h - LPS control		MHE-009005		39	08:39:00	20.2	1.22	0.097	0.0404	0.0314	0.0241	0.0088	0.0286			51.31	9.98	14.82	5.21	14.84	28.88	51	4.72	441	11.99	0.4	1.4	3.4	1.5857	0.889435	44.575	346.052	390.627	11.4111	0.425932	1.18175		1.38171	0.517994	4.50013	40.1971	0.617482
High iron diet	LPS - 18h	22 ug LPS	18	20.1.2015 13:00	21.1.2015 7:00		18h - LPS +Fe		MHE-009000		40	08:47:00	22.22	1.221	0.104	0.04444	0.0380333	0.0249	0.0108667	0.0295			53.02	9.73	14.97	5.6	15.39	28.23	55	4.94	527	12.83	0.5	1.5	3.6	1.74427	0.992654	75.9801	216.849	292.829	25.9469	0.700523	1.01085		2.03488	2.15665	2.33877	30.4157	0.834305
control normal iron diet	LPS - 6h	22 ug LPS	6	21.1.2015 9:00	21.1.2015 15:00		6h - LPS control		MHE-009029		41	14:48:00	18.5	1.082	0.05	0.037	0.0322	0.0237	0.0123	0.026	5.7937	3.71963	59.33	11.23	16.83	4.07	14.99	28.37	53	4.67	667	12.09	0.2	2.3	1.6	1.45225	0.963252	37.7368	255.006	292.742	12.8908	0.301196	0.762725		25.8405	1.28846	11.613	11.6663	0.358628
High iron diet	LPS - 6h	22 ug LPS	6	21.1.2015 9:00	21.1.2015 15:00		6h - LPS +Fe		MHE-009035		42	14:56:00	19.2	0.854	0.069	0.0384	0.0322667	0.0235	0.0113	0.0288	6.4513	3.54051	62.33	11.56	17.51	3.75	15.15	28.1	54	4.61	575	12.13	0.3	2	1.4	1.5072	1.00327	140.563	105.78	246.343	57.0599	1.03915	0.944535		57.6771	3.09893	18.731	16.9957	0.658979
control normal iron diet	LPS - 6h	22 ug LPS	6	21.1.2015 9:00	21.1.2015 15:00		6h - LPS control		MHE-009028		43	15:04:00	25	1.72	0.088	0.05	0.0357333	0.0273	0.0058	0.032	6.8988	3.83044	60.01	11.27	16.8	5.52	14.91	28	53	4.58	620	12.6	0.3	3.6	1.6	1.9625	1.25895	71.168	219.494	290.662	24.4848	0.558529	0.964236		36.5118	1.42064	12.8107	11.4058	0.279122
High iron diet	LPS - 6h	22 ug LPS	6	21.1.2015 9:00	21.1.2015 15:00		6h - LPS +Fe		MHE-009008		44	15:12:00	21.97	1.29	0.079	0.04394	0.0362333	0.0248	0.0082	0.0278	6.683	3.42197	61.91	11.38	17.46	4.09	15.34	28.19	54	4.63	636	11.99	0.3	2.5	1.3	1.72464	1.13719	143.349	66.4904	209.839	68.3137	1.07156	0.956461		54.3802	3.3471	19.8523	17.6099	0.390632
control normal iron diet	LPS - 6h	22 ug LPS	6	21.1.2015 9:00	21.1.2015 15:00		6h - LPS control		MHE-009025		45	15:19:00	19.9	1.31	0.076	0.0398	0.0244	0.0114	0.0106333	0.0242	5.6915	3.49259	58.26	11.06	16.5	4.69	14.91	28.32	53	4.81	707	12.03	0.3	3.1	1.3	1.56215	1.06059	36.2172	227.427	263.644	13.7371	0.296672	1.04138		37.4666	1.57581	14.0637	12.0074	0.359258
High iron diet	LPS - 6h	22 ug LPS	6	21.1.2015 9:00	21.1.2015 15:00		6h - LPS +Fe		MHE-009012		46	15:27:00	20.77	1.13	0.071	0.04154	0.0336333	0.0247	0.0104333	0.0317	6.2187	3.72723	62.86	11.61	17.62	3.11	15.18	28.04	54	4.62	547	12.34	0.2	2	0.9	1.63044	1.03707	112.957	139.025	251.982	44.8274	0.823313	1.21557		45.9085	3.38829	18.9388	12.4627	0.476069
control normal iron diet	LPS - 6h	22 ug LPS	6	21.1.2015 9:00	21.1.2015 15:00		6h - LPS control		MHE-009026		47	15:35:00	22.12	1.55	0.097	0.04424	0.0323667	0.0257	0.0116667	0.0279	6.4905	3.54123	59.01	11.12	16.54	5.54	14.88	28.04	53	4.68	501	12.14	0.4	3.7	1.4	1.73642	1.2987	37.2302	202.493	239.724	15.5305	0.299491	1.10832		51.577	1.6009	16.407	16.5428	0.384066
High iron diet	LPS - 6h	22 ug LPS	6	21.1.2015 9:00	21.1.2015 15:00		6h - LPS +Fe		MHE-009009		48	15:43:00	21.7	1.255	0.09	0.0434	0.0372	0.0245	0.00756667	0.025	6.7655	3.41061	60.61	11.12	16.98	3.69	15.26	28.01	54	4.61	545	12.38	0.3	2.1	1.3	1.70345	1.10447	150.187	82.3574	232.545	64.5843	1.16099	0.905434		58.2702	2.04153	18.2381	18.9235	0.62407
control normal iron diet	LPS - 6h	22 ug LPS	6	21.1.2015 9:00	21.1.2015 15:00		6h - LPS control		MHE-009027		49	15:50:00	23.3	1.585	0.077	0.0466	0.0378	0.0266	0.00963333	0.0305	6.8272	3.45703	59.67	11.38	16.49	4.63	14.49	27.63	52	4.66	758	12.2	0.4	2.3	1.9	1.82905	1.17786	40.5227	253.495	294.017	13.7824	0.320728	1.03105		23.4222	1.39035	13.8856	16.8553	0.341646
High iron diet	LPS - 6h	22 ug LPS	6	21.1.2015 9:00	21.1.2015 15:00		6h - LPS +Fe		MHE-009011		50	15:58:00	21.56	1.303	0.085	0.04312	0.0346333	0.024	0.0133667	0.0249	6.471	3.42848	64.4	11.8	17.99	3.96	15.25	27.94	55	4.76	497	12.03	0.3	2.6	1.1	1.69246	1.1179	187.417	70.646	258.064	72.6246	1.30939	0.944242		30.4422	2.1941	14.6191	16.8822	0.487956
control normal iron diet	LPS - 6h	22 ug LPS	6	21.1.2015 9:00	21.1.2015 15:00		6h - LPS control		MHE-009024		51	16:06:00	23.24	1.647	0.084	0.04648	0.0376333	0.0262	0.0132667	0.0297	6.5536	3.39992	61.49	11.75	16.88	5.7	14.37	27.45	52	4.55	753	11.88	0.5	3.2	2	1.82434	1.30978	56.2252	189.649	245.874	22.8675	0.424927	1.03439		22.6808	1.5036	9.33407	10.2091	0.342399
High iron diet	LPS - 6h	22 ug LPS	6	21.1.2015 9:00	21.1.2015 15:00		6h - LPS +Fe		MHE-009010		52	16:14:00	22.68	1.321	0.097	0.04536	0.0362	0.0262	0.0130667	0.0305	6.4736	3.37137	60.09	10.95	16.71	4.2	15.26	27.81	55	4.64	555	12.56	0.4	2.5	1.3	1.78038	1.15031	124.861	125.047	249.908	49.9627	0.97795	0.946308		25.8246	2.60472	15.3574	14.0361	0.35074
control normal iron diet	LPS - 48h	22 ug LPS	48	20.1.2015 9:15	22.1.2015 9:00		48h - LPS control		MHE-009056		53	08:50:00	20	1.254	0.087	0.04	0.0352333	0.0242	0.0141	0.02985			49.15	9.57	14.47	4.75	15.12	29.44	51	5.51	269	11.93	0.1	3.2	1.4	1.57	1.05504	111.944	364.941	476.885	23.474	1.11712	1.00159		0.150969	0.593262	0.834907	13.4765	0.88332
High iron diet	LPS - 48h	22 ug LPS	48	20.1.2015 9:15	22.1.2015 9:00		48h - LPS +Fe		MHE-009053		54	08:57:00	20.1	1.016	0.107	0.0402	0.0321667	0.0221	0.0114667	0.0351			55.25	10.4	16.12	3.59	15.5	29.18	53	5.67	217	12.36	0.1	2	1.5	1.57785	1.13815	327.221	140.914	468.135	69.8988	2.87371	0.895467		0.31666	2.08011	0.903946	7.15903	2.74861
control normal iron diet	LPS - 48h	22 ug LPS	48	20.1.2015 9:15	22.1.2015 9:00		48h - LPS control		MHE-009059		55	09:05:00	20.86	1.35	0.087	0.04172	0.0316333	0.0226	0.0148333	0.0318			51.81	10.08	15.32	5.43	15.2	29.57	51	5.46	434	12.34	0.2	3.4	1.8	1.63751	0.862132	129.926	346.43	476.356	27.275	1.22875	1.12507		0.180462	1.09267	0.627583	9.1599	1.66168
High iron diet	LPS - 48h	22 ug LPS	48	20.1.2015 9:15	22.1.2015 9:00		48h - LPS +Fe		MHE-009052	etwas struppig/Durchfall?	56	09:13:00	18.56	1.086	0.06	0.03712	0.0383667	0.0221	0.0084	0.0285			61.52	11.5	16.93	3.44	14.72	27.52	53	6.1	294	12.01	0.2	1.1	2.1	1.45696	0.964596	192.989	280.317	473.307	40.7747	1.4574	1.05953		0.507573	3.07383	1.15767	31.6176	2.10346
control normal iron diet	LPS - 48h	22 ug LPS	48	20.1.2015 9:15	22.1.2015 9:00		48h - LPS control		MHE-009060		57	09:21:00	19.97	1.33	0.08	0.03994	0.0313	0.0205	0.00893333	0.0261			52.97	10.26	15.55	3.59	15.15	29.36	52	5.3	592	12.03	0.2	1.9	1.5	1.56764	1.05244	142.083	281.828	423.911	33.5171	1.31137	0.95596		0.342717	0.651045	0.379911	6.50598	0.947082
High iron diet	LPS - 48h	22 ug LPS	48	20.1.2015 9:15	22.1.2015 9:00		48h - LPS +Fe		MHE-009049		58	09:29:00	21.36	1.08	0.108	0.04272	0.0322667	0.021	0.0110667	0.0296			53.97	10.04	15.59	4.74	15.52	28.88	54	5.72	200	12.44	0.3	2.2	2.2	1.67676	1.08131	219.836	163.204	383.039	57.3925	1.98586	1.11938		0.566528	2.35496	0.821909	6.99328	2.99545
control normal iron diet	LPS - 48h	22 ug LPS	48	20.1.2015 9:15	22.1.2015 9:00		48h - LPS control		MHE-009057		59	09:37:00	19.87	1.122	0.093	0.03974	0.0308	0.0201	0.012	0.0277			50.15	9.76	14.69	5.34	15.05	29.3	51	5.91	273	11.93	0.3	2.9	2.1	1.5598	0.88997	127.393	311.674	439.067	29.0145	1.2463	1.0746		0.341763	0.924341	0.299701	11.7322	0.807067
High iron diet	LPS - 48h	22 ug LPS	48	20.1.2015 9:15	22.1.2015 9:00		48h - LPS +Fe		MHE-009054	etwas struppig/Durchfall?	60	09:45:00	19.44	1.007	0.076	0.03888	0.0333333	0.0227	0.0087	0.0295			58.19	10.92	16.39	3.7	15	28.16	53	5.95	267	12.26	0.2	1.1	2.4	1.52604	0.990276	300.628	157.159	457.787	65.6698	2.46671	1.16022		0.641177	3.19231	1.60492	16.6502	2.69181
control normal iron diet	LPS - 48h	22 ug LPS	48	20.1.2015 9:15	22.1.2015 9:00		48h - LPS control		MHE-009055		61	09:54:00	20.11	1.31	0.096	0.04022	0.0343667	0.0211	0.00926667	0.028			51.42	9.99	15.09	5.52	15.1	29.34	51	5.43	488	12.24	0.3	3.3	1.9	1.57864	0.878387	138.537	331.318	469.855	29.485	1.32079	0.958233		0.0902514	0.844674	0.372361	9.06663	0.746124
High iron diet	LPS - 48h	22 ug LPS	48	20.1.2015 9:15	22.1.2015 9:00		48h - LPS +Fe		MHE-009050		62	10:02:00	19.8	1.037	0.097	0.0396	0.0333333	0.0221	0.01	0.02675			61.11	11.42	17.26	5.57	15.12	28.24	54	5.65	369	12.18	0.5	2.6	2.5	1.5543	1.06905	213.504	166.604	380.108	56.1693	1.6295	1.08714		0.403279	2.78862	1.3609	4.69287	3.35113
control normal iron diet	LPS - 48h	22 ug LPS	48	20.1.2015 9:15	22.1.2015 9:00		48h - LPS control		MHE-009058		63	10:10:00	18.98	1.25	0.087	0.03796	0.0338	0.02	0.0128333	0.02565			49.67	9.63	13.99	5.58	14.53	28.17	52	5.71	478	11.87	0.3	3	2.3	1.48993	0.770581	127.393	311.296	438.689	29.0395	1.2583	0.930557		0.306897	0.908285	0.5559	8.78784	0.847584
High iron diet	LPS - 48h	22 ug LPS	48	20.1.2015 9:15	22.1.2015 9:00		48h - LPS +Fe		MHE-009051		64	10:18:00	21	1.09	0.097	0.042	0.0396333	0.023	0.0125	0.0281			54.79	10.1	15.07	3.89	14.91	27.5	54	5.65	428	12.42	0.2	1.6	2.1	1.6485	0.941088	272.009	112.58	384.589	70.7271	2.41339	0.748885		0.319113	2.3792	2.43475	28.0316	3.01066
control normal iron diet	control - 48h	control	48	20.1.2015 9:00	22.1.2015 9:00		48h - NaCl control		MHE-009043		65	10:46:00	23.7	1.626	0.069	0.0474	0.0368667	0.0241	0.0144667	0.0296	6.3716	3.71963	57.38	10.89	15.76	8.06	14.47	27.46	53	4.85	1486	12.44	0.4	5.8	1.9	1.86045	1.25955	114.223	188.138	302.361	37.7772	0.955384	0.755375		0.15599	0.243921	0.37777	0.0482748	0.600122
High iron diet	control - 48h	control	48	20.1.2015 9:00	22.1.2015 9:00		48h - NaCl +Fe		MHE-009034->38		66	10:54:00	24.7	1.551	0.074	0.0494	0.034	0.0237	0.0147333	0.0272	6.9764	3.54051	57.75	10.52	16.08	5.54	15.28	27.83	55	5.35	1191	12.86	0.2	4.5	0.8	1.93895	1.33269	228.953	30.2229	259.176	88.3389	1.89838	0.976339		0.218616	1.64491	0.238091	0.0319045	2.20837
control normal iron diet	control - 48h	control	48	20.1.2015 9:00	22.1.2015 9:00		48h - NaCl control		MHE-009042		67	11:02:00	25.6	1.814	0.066	0.0512	0.0424	0.0273	0.0159667	0.0302	6.6833	3.83044	53.53	10.05	14.61	2.36	14.53	27.29	53	4.89	1370	12.73	0.1	1.7	0.6	2.0096	1.20925	142.843	120.892	263.734	54.1616	1.30269	0.955295		0.453775	0.298715	0.2445	0.0186009	0.776484
High iron diet	control - 48h	control	48	20.1.2015 9:00	22.1.2015 9:00		48h - NaCl +Fe		MHE-009019		68	11:10:00	21.4	1.15	0.07	0.0428	0.0318667	0.0221	0.0145333	0.0274	6.2537	3.42197	58.17	10.53	16.09	6.02	15.28	27.66	55	4.7	1263	12.57	0.3	4.5	1.2	1.6799	1.25122	204.893	12.4669	217.36	94.2644	1.68199	0.772687		0.266234	1.05421	0.617128	0.114834	2.20475
control normal iron diet	control - 48h	control	48	20.1.2015 9:00	22.1.2015 9:00		48h - NaCl control		MHE-009041->39		69	11:20:00	23.7	1.67	0.064	0.0474	0.0104333	0.0405	0.0157	0.0274	6.7858	3.49259	13.05	2.5	3.74	2.12	14.96	28.68	52	5.2	374	12.35	0	1.7	0.4	1.86045	0.299352	166.396	113.714	280.11	59.4039	2.83938	NA		NA	NA	NA	NA	NA
High iron diet	control - 48h	control	48	20.1.2015 9:00	22.1.2015 9:00		48h - NaCl +Fe		MHE-009077	extrem dünne Maus!!!	70	11:28:00	12.5	0.49	0.031	0.025	0.0212667	0.016	0.0121667	0.0184	3.3537	3.72723	3.93	0.76					52	4.47	83	11.83	NA	NA	NA	NA	NA	NA	NA	NA	NA	NA	1.04202		0.25829	2.24507	0.516861	0.0310988	1.41014
control normal iron diet	control - 48h	control	48	20.1.2015 9:00	22.1.2015 9:00		48h - NaCl control		MHE-009040		71	11:36:00	25	1.86	0.08	0.05	0.0377667	0.0259	0.0165	0.0283	7.0597	3.54123	53.94	10.25	14.87	4.82	14.51	27.56	53	4.74	1123	12.18	0.2	3.7	0.9	1.9625	1.26181	NA	NA	NA	NA	NA	1.25812		0.334836	0.465534	0.186374	0.0286535	1.30761
High iron diet	control - 48h	control	48	20.1.2015 9:00	22.1.2015 9:00		48h - NaCl +Fe		MHE-009078		72	11:44:00	23.7	1.46	0.084	0.0474	0.036	0.0239	0.0154333	0.0288	6.9489	3.41061	59.1	10.8	16.11	6.05	14.92	27.26	55	4.76	1524	12.91	0.2	4.7	1.2	1.86045	1.32461	222.875	9.06687	231.942	96.0909	1.78893	0.982797		0.216261	1.79961	0.435302	0.0424595	4.9393
High iron diet	naive control		0	-	20.1.2015 11:30		Fe - blood parameters, naive		MHE-009036		73												55.76	10.08	15.73	3.2	15.61	28.21	55	4.56	1201	12.51	0.1	2.5	0.6	NA	NA	208.185	44.201	252.386	82.4868	NA
High iron diet	naive control		0	-	20.1.2015 11:30		Fe - blood parameters, naive		MHE-009037		74												53.4	9.69	15.14	5.07	15.63	28.35	55			12.69	0.1	4.4	0.6	NA	NA	200.587	15.4892	216.077	92.8316	NA
High iron diet	naive control		0	-	20.1.2015 11:30		Fe - blood parameters, naive		MHE-009038		75												54.81	9.93	15.64	5.29	15.74	28.54	55	4.6	1103	12.44	0.1	4.4	0.8	NA	NA	203.12	34.3785	237.499	85.5247	NA
[truncated: 39 more columns]

## Sheet: Tabelle2
food	short name	treatment	incubation time group (h)	lab ID	carcass iron (ug Fe/g dry weight)	calculated total carcass Fe (ug Fe/carcass of 25g std mouse)
control normal iron diet	control - 18h	control	18	21		0
control normal iron diet	control - 18h	control	18	23		0
control normal iron diet	control - 18h	control	18	25		0
control normal iron diet	control - 18h	control	18	27		0
High iron diet	control - 18h	control	18	22		0
High iron diet	control - 18h	control	18	24		0
High iron diet	control - 18h	control	18	26		0
High iron diet	control - 18h	control	18	28		0
control normal iron diet	control - 48h	control	48	65	72.5589	487.675
control normal iron diet	control - 48h	control	48	67	70.0594	457.254
control normal iron diet	control - 48h	control	48	69	68.5642	490.784
control normal iron diet	control - 48h	control	48	71	70.3828	496.881
High iron diet	control - 48h	control	48	66	324.504	2291.37
High iron diet	control - 48h	control	48	68	83.0676	606.869
High iron diet	control - 48h	control	48	70	121.344	813.9
High iron diet	control - 48h	control	48	72	568.894	4170.03
control normal iron diet	control - 6h	control	6	13	65.704	470.051
control normal iron diet	control - 6h	control	6	15	68.2098	533.981
control normal iron diet	control - 6h	control	6	16	64.0917	444.974
control normal iron diet	control - 6h	control	6	19	68.6669	518.805
High iron diet	control - 6h	control	6	14	84.5534	719.972
High iron diet	control - 6h	control	6	17	84.4356	606.568
High iron diet	control - 6h	control	6	18	371.337	2534.95
High iron diet	control - 6h	control	6	20	81.1351	642.649
control normal iron diet	LPS - 18h	22 ug LPS	18	29		0
control normal iron diet	LPS - 18h	22 ug LPS	18	31		0
control normal iron diet	LPS - 18h	22 ug LPS	18	33		0
control normal iron diet	LPS - 18h	22 ug LPS	18	35		0
control normal iron diet	LPS - 18h	22 ug LPS	18	37		0
control normal iron diet	LPS - 18h	22 ug LPS	18	39		0
High iron diet	LPS - 18h	22 ug LPS	18	30		0
High iron diet	LPS - 18h	22 ug LPS	18	32		0
High iron diet	LPS - 18h	22 ug LPS	18	34		0
High iron diet	LPS - 18h	22 ug LPS	18	36		0
High iron diet	LPS - 18h	22 ug LPS	18	38		0
High iron diet	LPS - 18h	22 ug LPS	18	40		0
control normal iron diet	LPS - 48h	22 ug LPS	48	53		0
control normal iron diet	LPS - 48h	22 ug LPS	48	55		0
control normal iron diet	LPS - 48h	22 ug LPS	48	57		0
control normal iron diet	LPS - 48h	22 ug LPS	48	59		0
control normal iron diet	LPS - 48h	22 ug LPS	48	61		0
control normal iron diet	LPS - 48h	22 ug LPS	48	63		0
High iron diet	LPS - 48h	22 ug LPS	48	54		0
High iron diet	LPS - 48h	22 ug LPS	48	56		0
High iron diet	LPS - 48h	22 ug LPS	48	58		0
High iron diet	LPS - 48h	22 ug LPS	48	60		0
High iron diet	LPS - 48h	22 ug LPS	48	62		0
High iron diet	LPS - 48h	22 ug LPS	48	64		0
control normal iron diet	LPS - 6h	22 ug LPS	6	41	71.1824	557.31
control normal iron diet	LPS - 6h	22 ug LPS	6	43	78.4338	541.099
control normal iron diet	LPS - 6h	22 ug LPS	6	45	91.5949	654.915
control normal iron diet	LPS - 6h	22 ug LPS	6	47	72.0027	528.18
control normal iron diet	LPS - 6h	22 ug LPS	6	49	68.7703	503.764
control normal iron diet	LPS - 6h	22 ug LPS	6	51	72.2204	509.148
High iron diet	LPS - 6h	22 ug LPS	6	42	100.205	841.733
High iron diet	LPS - 6h	22 ug LPS	6	44	235.269	1789.15
High iron diet	LPS - 6h	22 ug LPS	6	46	100.147	749.623
High iron diet	LPS - 6h	22 ug LPS	6	48	87.8355	684.621
High iron diet	LPS - 6h	22 ug LPS	6	50	91.8178	688.953
High iron diet	LPS - 6h	22 ug LPS	6	52	89.1906	636.447
High iron diet	naive control		0	73	3.27524
High iron diet	naive control		0	74	3.12401
High iron diet	naive control		0	75	3.36119
control normal iron diet	no treatment		0	1	67.5367	451.447
control normal iron diet	no treatment		0	3	73.0396	555.155
control normal iron diet	no treatment		0	5	66.1688	442.674
control normal iron diet	no treatment		0	7	78.0433	547.659
control normal iron diet	no treatment		0	9	66.0117	508.647
control normal iron diet	no treatment		0	11	66.584	489.845
High iron diet	no treatment		0	2	85.8103	667.759
High iron diet	no treatment		0	4	330.919	2400.43
High iron diet	no treatment		0	6	786.482	5508.08
High iron diet	no treatment		0	8	209.858	1601.85
High iron diet	no treatment		0	10	211.617	1693.47
High iron diet	no treatment		0	12	NA	NA
